# Supplementary material
Source: publisher figshare collection journal article supplement (https://aacr.figshare.com/ndownloader/files/39867464)
Supplement: Supplementary file 1 [file 39867464]

**Table S1.** Patient and tumor characteristics of the study population.

| Patient tissue groups | No. of Samples | Patient Age (years) |       |
|-----------------------|----------------|---------------------|-------|
|                       |                | Mean (Median)       | Range |
| Normal                | 34             | 43 (44)             | 17-70 |
| CIS                   | 75             | 55.9 (57)           | 27-83 |
| IBC                   | 142            | 54.5 (53)           | 23-88 |
| IBC normal match      | 77             | 50.8 (49)           | 23-88 |

  

| Characteristic           | Status               | IBC (%) | CIS (%) |
|--------------------------|----------------------|---------|---------|
| Tumor size               | pT1                  | 26.1%   |         |
|                          | pT2                  | 59.2%   |         |
|                          | pT3                  | 10.6%   |         |
|                          | pT4                  | 3.5%    |         |
|                          | No report            | 0.7%    |         |
| Lymph node status        | Positive             | 56.3%   |         |
|                          | Negative             | 34.5%   |         |
|                          | No report            | 9.2%    |         |
| Grade (Nottingham score) | I                    | 4.2%    |         |
|                          | II                   | 31.0%   |         |
|                          | III                  | 57.7%   |         |
|                          | No report            | 7.0%    |         |
| Nuclear grade            | Low                  |         | 9.3%    |
|                          | Medium               |         | 52.0%   |
|                          | High                 |         | 37.3%   |
|                          | No report            |         | 1.3%    |
| ER                       | Negative             | 36.6%   | 18.5%   |
|                          | Positive             | 63.4%   | 81.5%   |
|                          | No report            | 0.0%    | 0.0%    |
| PR                       | Negative             | 46.5%   | 21.5%   |
|                          | Positive             | 53.5%   | 78.5%   |
|                          | No report            | 0.0%    | 0.0%    |
| HER2/ErbB2               | Negative/Equivocal   | 79.6%   | 72.3%   |
|                          | Positive             | 20.4%   | 23.1%   |
|                          | No report            | 0.0%    | 4.6%    |
| Histological type        | IDC                  | 88.4%   |         |
|                          | ILC                  | 11.6%   |         |
|                          | Both                 | 3.4%    |         |
|                          | DCIS (with invasion) |         | 5.1%    |
|                          | DCIS (no invasion)   |         | 88.5%   |
|                          | LCIS                 |         | 6.4%    |
